# Supplementary material for: Endophytic Bacteria Colonizing the Petiole of the Desert Plant Zygophyllum dumosum Boiss: Possible Role in Mitigating Stress
Source: MDPI journal article supplement (doi:10.3390/plants11040484), 2022-02-11
Supplement: s1 [file s1]

# Endophytic bacteria colonizing the petiole of the desert plant *Zygophyllum dumosum* Boiss: possible role in mitigating stress

Jansirani Srinivasan<sup>1,2</sup>, Janardan Khadka<sup>1</sup>, Nurit Novoplansky<sup>1</sup>, Osnat Gillor<sup>2</sup> and Gideon Grafi<sup>1\*</sup>

<sup>1</sup>French Associates Institute for Agriculture and Biotechnology of Drylands, <sup>2</sup>Zuckerberg Institute for Water Research, Jacob Blaustein Institutes for Desert Research, Ben-Gurion University of the Negev, Midreshet Ben Gurion 84990, Israel.

Figure S1. Calculating sodium concentration in winter and summer petioles

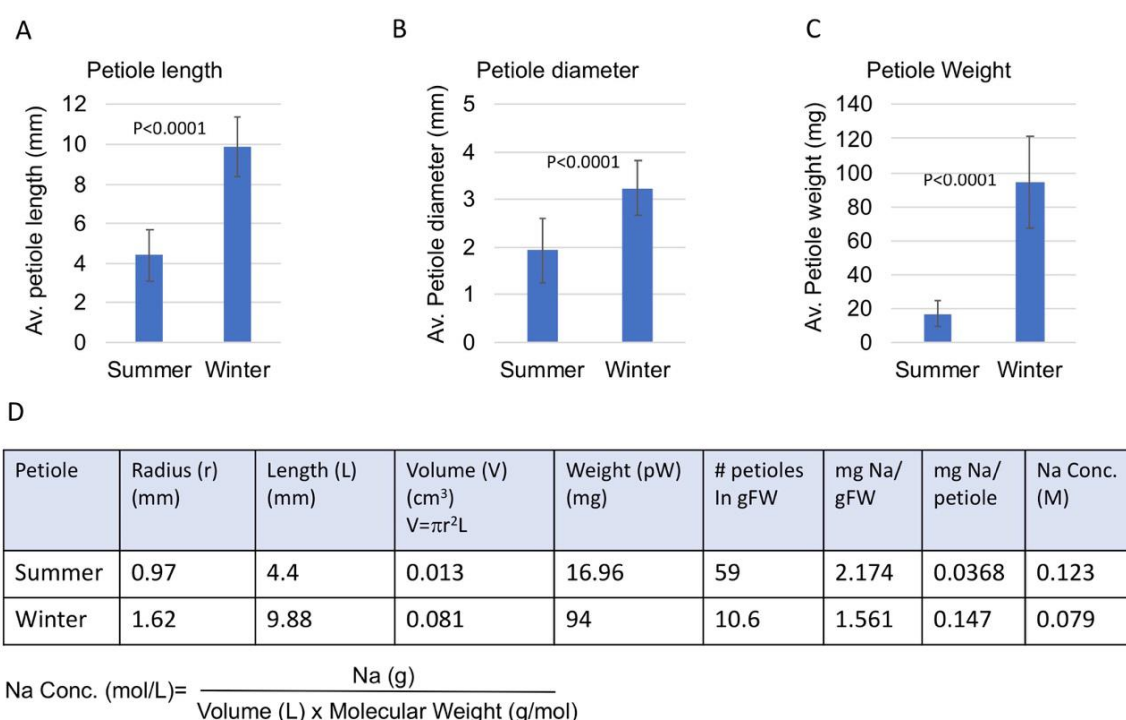

Fig. S1.petiole as a cylinder and determined its average volume ( $V_p = \pi r^2 h$ ) based on the measurements of petiole length (A), radius (B) and calculated sodium concentration based on petiole average weight (C). Statistical differences between treatments was perform by unpaired t test (GraphPad) and the p values are shown. (D) The data and formulas for calculation of Na concentration. Summer and winter petioles refer to petioles collected in October and April of 2010, respectively.

*Figure S2. 16S rDNA sequencing*

The list of 16S rDNA sequences of isolated endophytes. 16S rDNAs were PCR amplified using 1492-R and 27-F primers and each amplicon was sequenced in forward and reverse using the abovementioned primers. The F and R sequences were aligned and the combined seq data was used for NCBI blast analysis. Note, the sequence of one clone for each identified endophyte is shown.

> J3 / *Domibacillus robiginosus*

```
CTATACATGCAAGTCGAGCGGATTTAATTAGAGCTTGCTCTAATTAATTACCGCGGACGGGTGAGTAA
CACGTGGGCAACCTGCCCTGCAAATTGGGATAACTCCGGGAAACCGGGGCTAATACCGAATAACATTGG
AAACCTCATGGTTTCCTTTTAAAGGGCGGCTTCGGCTGTCACTGCAGGATGGGCCCGGGCGCATTACCT
AGTTGGTGAGGTAACGGCTCACCAAGGCAACAATGCGTACCCAACCTGAAAGGGTGATCGGCCACACTG
GGACTGAAACACGGCCCAAACCTCTACGGGAGGCAGCAGTAGGGAATCTTCGCAATGGACGAAAGTCT
GACGGAGCAACGCCCCGTGAGTGAAAAAGGTTTTCGGATCGTAAACTCTGTTGTCAGGGAAGAACAAG
TACGGGAGTAAGTACCGTACCTTGACGGTACCTGGCCAGAAAGCCACGGCTAACTACTTGCCAGCACCC
GCGGTAATACGTAGGTGGCAAGCGTTGTCCGGAATTATTGGGCGTAAAGCGCGCGCAGGCGGCCTTTTA
AGTCTGATGTGAAAGCCCCGGCTCAACCGGGGAGGGTCATTGGAACTGGAAGGCTTGAGTGCAGAA
GAGAAGAGCGGAATTCACGTGTAGCGGTGAAATGCGTAGAGATGTGGAGGAACACCAAGTGGCGAAG
GCGGCTCTTTGGTCTGTAAGTACGCTGAGGCGCGAAAGCGTGGGGAGCGAACAGGATTAGATACCTG
GTAGTCCACGCCGTAAACGATGAGTGCTAAGTGTGGGGGGTTTCGCCCCCTCAGTGCTGCAGCTAACG
CATTAAAGCACTCCGCCTGGGGAGTACGGCCGCAAGGCTGAAACTCAAAGGAATTGACGGGGGCCCCGCA
CAAGCGGTGGAGCATGTGGTTTAATTCGAAGCAACGCGAAGAACCCTTACCAGGTCTTGACATCCCCTG
ACCGGTCTGGAGACAGATCTTCCCTTCGGGGGACGCGGTGACAGGTGGTGCATGGTTGTCGTCAGCTC
GTGTCGTGAGATGTTGGGTTAAGTCCCGCAACGAGCGCAACCCTTGATCTTAGTTGCCAGCATTAGTTG
GGCACTCTAAGGTGACTGCCGGTGACAAACCGGAGGAAGGTGGGGATGACGTCAAATCATCATGCCCT
TATGACCTGGGCTACACACGTGCTACAATGGATGGTACAAAGGGCTGCAAGACCGCGAGGTTTAGCCAA
TCCCATAAAACCATTCTCAGTTCGGATTGCAGGCTGCAACTCGCCTGCATGAAGCTGGAATCGCTAGTAA
TCGCGGATCAGCATGCCGCGGTGAATACGTTCCGGGGCCTTGACACACCGCCCGTCACACCACGAGAGT
TTGCAACACCCGAAGTCGGTGGGGTAACCCTTACGGGAGCCAGCCGCCGAAG
```

> J6 / *Actinotalea ferrariae*

GCAGTCGAACGGTGATCTCGGTGCTTGACCCGGGTGATCAGTGGCGAACGGGTGAGTAACACGTGAGT  
AACCTGCCCCGACTCTGGGATAACCCCGGGAAATCGGAGCTAATACCGGATACGAGACGCACAGGCAT  
CTGTAGCGTCTGGAAAGAATTCGGTCGGGGATGGACTCGCGGCCTATCAGCTAGTTGGTGGGGTAACG  
GCCCACCAAGGCGACGACGGGTAGCCGGCCTGAGAGGGCGACCGGCCCACTGGGACTGAGACACGG  
CCCAGACTCCTACGGGAGGCAGCAGTGGGGAATATTGCACAATGGGCGAAAGCCTGATGCAGCGACGC  
CGCGTGGGGGATGAAGGCCCTTCGGGTGTAAACCCCTTTCAGCAGGGAAGAAGCGAAAGTGACGGTAC  
CTGCAGAAGAAGCGCCGGCTAACTACGTGCCAGCAGCCGCGGTAATACGTAGGGCGCAAGCGTTGTCC  
GGAATTATTGGGCGTAAAGAGCTCGTAGGCGGTTTGTGCGTCTGCTGTGAAAACCCGAGGCTCAACCT  
CGGGCCTGCAGTGGGTACGGGCAGACTAGAGTGCGGTAGGGGAGACTGGAATTCCTGGTGTAGCGGTG  
GAATGCGCAGATATCAGGAGGAACCCGATGGCGAAGGCAGGTCTCTGGGCCGCAACTGACGCTGAGG  
AGCGAAAGCATGGGGAGCGAACAGGATTAGATACCCTGGTAGTCCATGCCGTAAACGTTGGGCACTAG  
GTGTGGGGCTCATTCCACGAGTTCGTGCCGAGCAAAACGCATTAAGTCCCCGCCTGGGGAGTACGGC  
CGCAAGGCTAAACTCAAAGGAATTGACGGGGCCCCGCACAAGCGGCGGAGCATGCGGATTAATTCGA  
TGCAACGCGAAGAACCTTACCAAGGCTTGACATATACCGAAAACCTCATGGAGACATGGGGTCCGCAAGG  
GCGGTATACAGGTGGTGCATGGTTGTCGTACGCTCGTGTGAGATGTTGGGTTAAGTCCCGCAACGA  
GCGCAACCCCTCGTCTATGTTGCCAGCACATTATGGTGGGGACTCATAGGAGACTGCCGGGTCAACTC  
GGAGGAAGGTGGGGATGACGTCAAATCATCATGCCCTTATGTCTTGGGCTTCACGCATGCTACAATGG  
CCGGTACAAAGGGCTGCGATACCGGAGGTGGAGCGAATCCAAAAAGCCGGTCTCAGTTCCGATTGG  
GGTCTGCAACTCGACCCCATGAAGTCGGAGTCGCTAGTAACTCGCAGATCAGCAACGCTGCGGTGAATAC  
GTTCCCGGGCCTTGACACACCGCCCGTCAAGTCACGAAAGTCGGTAACACCCGAAGCCGGTGGCCAA  
CCCTTGGGAGGGAGCCGTCG

> J14 / *Bacillus jeotgali*

CTATACATGCAGTCGAGCGGATCTTCATTAGCTTGCTTTTGAAGATCAGCGGCGGACGGGTGAGTAACAC  
GTGGGCAACCTGCCTGTAAGACTGGGATAACTTCGGGAAACCGGAGCTAATACCGGATAATCCTTCCCT  
CACATGAGGGAAAGCTGAAAGACGGTTTCGGCTGTCACTTACAGATGGGCCCCGCGCGCATTAGCTAGT  
TGGTGAGGTAATGGCTACCAAGGCAACGATGCGTAGCCGACCTGAGAGGGTGATCGGCCCACTGGG  
ACTGAGACACGGCCCAGACTCCTACGGGAGGCAGCAGTAGGGAATCTTCGCAATGGACGAAAGTCTG  
ACGGAGCAACGCCGCGTGAACGATGAAGGCTTTCGGGTGTAAGTTCTGTTGTCAGGGAAGAACAAGT  
ACCGGAGTAAGTCCCGGTACCTTGACGGTACCTGACCAGAAAGCCACGGCTAACTACGTGCCAGCAGCC  
GCGGTAATACGTAGGTGGCAAGCGTTGTCGGAATTATTGGGCGTAAAGCGCGCGCAGGCGGTTCCCTTA  
AGTCTGATGTGAAAGCCCCGGCTCAACCGGGGAGGGTCATTGGAAACTGGGGAAGTGTGAGTGCAGAA  
GAGGAGAGCGGAATTCCACGTGTAGCGGTGAAATGCGTAGAGATGTGGAGGAACACCAAGTGGCGAAG  
GCGGCTCTCTGGTCTGTAAGTACGCTGAGGCGCGAAAGCGTGGGGAGCGAACAGGATTAGATACCCT  
GGTAGTCCACGCCGTAAACGATGAGTGCTAAGTGTTAGAGGGTTTCCGCCCTTAGTGCTGCAGCAAC  
GCATTAAGCACTCCGCTGGGGAGTACGGCCGCAAGGCTGAAACTCAAAGGAATTGACGGGGGGCCCGC  
ACAAGCGGTGGAGCATGTGGTTAATTGGAAGCAACGCGAAGAACCTTACCAGGTCTTGACATCCTCTGA  
CAACCCTAGAGATAGGGCGTTCCCTTCGGGGGACAGAGTGACAGGTGGTGCATGGTTGTCGTACGCTC  
GTGTCGTGAGATGTTGGGTTAAGTCCCGCAACGAGCGCAACCCCTGATCTTAGTTGCCAGCATTAGTTG  
GGCACTCTAAGGTGACTGCCGGTGACAAACCGGAGGAAGGTGGGGATGACGTCAAATCATCATGCCCTT  
TATGACCTGGGCTACACACGTGCTACAATGGATGGAACAAAGGGTCGCGAAGCCGCGAGGTGAGCCA  
ATCCCATAAATCCATTCTCAGTTCCGATTGACGGCTGCAACTCGCCTGCATGAAGCCGGAATCGCTAGTA  
ATCGCGGATCAGCATGCCGCGGTGAATACGTTCCCGGGCCTTGACACACCGCCCGTCACACCACGAGA  
GTTTGTAACACCCGAAGTCGGTGGGGTAACCTTTTGGTAGCCAGCCGCCTAA



>J18 / *Bacillus licheniformis*

TGCAAGTCGAGCGGACCGACGGGAGCTTGCTCCCTTAGGTCAGCGGCGGACGGGTGAGTAACACGTGG  
GTAACCTGCCTGTAAGACTGGGATAACTCCGGGAAACCGGGGCTAATACCGGATGCTTGATTGAACCGC  
ATGGTTCAATCATAAAAGGTGGCTTTTAGCTACCACTTGAGATGGACCCGCGGCGCATTAGCTAGTTGG  
TGAGGTAACGGCTACCAAGGCGACGATGCGTAGCCGACCTGAGAGGGTGATCGGCCACACTGGGACT  
GAGACACGGCCCAGACTCCTACGGGAGGCAGCAGTAGGGAATCTCCGCAATGGACGAAAGTCTGACG  
GAGCAACGCCGCGTGAGTGATGAAGGTTTTCGGATCGTAAACTCTGTTGTTAGGGAAGAACAAGTACC  
GTTGCAATAGGGCGGCACCTTGACGGTACCTAACCAGAAAGCCACGGCTAACTACGTGCCAGCAGCCGC  
GGTAATACGTAGGTGGCAAGCGTTGTCCGGAATTATTGGGCGTAAAGCGCGCGCAGGCGGTTTCTTAAG  
TCTGATGTGAAAGCCCCGGCTCAACCGGGGAGGGTCATTGGAACTGGGGAACCTTGAGTGCAGAAGA  
GGAGAGTGGAATCCACGTGTAGCGGTGAAATGCGTAGAGATGTGGAGGAACACCACTGGCGAAGGC  
GACTCTCTGGTCTGTAAGTACGCTGAGGCGCGAAAGCGTGGGGAGCGAAGAGGATTAGATACCTGGT  
AGTCCACGCCGTAAACGATGAGTGCTAAGTGTAGAGGGTTTCCGCCCTTAGTGCTGCAGCAAACGCAT  
TAAGCACTCCGCTGGGGAGTACGGTCGCAAGACTGAACTCAAAGGAATTGACGGGGGCCGACAA  
GCGGTGGAGCATGTGGTTTAATTCGAAGCAACGCGAANAACCTTACCNNTCTTGACATCCTCTGACNAC  
CCTAGAGATAGGGCTTCCCCTCGGGGGCAGAGTGACNGNTGGNGCATGGNNTCGTCAGCTCNGTC

>J21 / *Brevibacillus halotolerans*

TGCAGTCGAGCGAGGGTTTTCGGACCCTAGCGGCGGACGGGTGAGTAACACGTAGGCAACCTGCCTGTA  
AGACTGGGATAACATAGGGAACTTATGCTAATACCGGATAGGGTTTTGCTTCGCATGAAGCGAAACGG  
AAAGATGGCGCAAGCTATCACTTGAGATGGGCTGCGGCGCATTAGCTAGTTGGTGAGGTAAAGGCTC  
ACCAAGGCGACGATGCGTAGCCGACCTGAGAGGGTGACCGCCACACTGGGACTGAGACACGGCCCAG  
ACTCCTACGGGAGGCAGCAGTAGGGAATTTCCACAATGGACGAAAGTCTGATGGAGCAACGCCGCGTG  
AACGATGAAGGCTTTCGGGTCGTAAAGTCTGTTGTTAGGGAAGAAACAGTGCCATTTGAATAAGATGG  
CGCCTTGACGGTACCTAACGAGAAAAGCCACGGCTAACTACGTGCCAGCAGCCGCGGTAATACGTAGGTG  
GCAAGCGTTGTCCGGAATTATTGGGCGTAAAGCGCGCGCAGGTGGCTATGTAAGTCTGATGTTAAAGCC  
CGAGGCTCAACCTCGGTTGCGATTGGAACTGCGTAGCTTGAGTGACAGGAGAGGAAAGTGGTATTCCAC  
GTGTAGGTATTCCACGTGTAGCGGTGAAATGCGTAGAGATGTGGAGGAACACCACTGGCGAAGGCGAC  
TTTCTGGCCTGTAAGTACACTGAGGCGCGAAAGCGTGGGGAGCAAACAGGATTAGATACCTGGTAGT  
CCACGCCGTAAACGATGAGTGCTAGGTGTTAGGGGTTTCAATACCCTTAGTGCCGCGAGCTAACGCAATAA  
GCACTCCGCTGGGGAGTACGCTCGCAAGAGTGAACTCAAAGGAATTGACGGGGGCCGACAAGCG  
GTGGAGCATGTGGTTTAATTCGAAGCAACGCGAAGAACCTTACCAGGTCTTGACATCCCACTGACCGCTC  
TAGAGATAGAGCTTCCCTTCGGGGCAGTGGTGACAGGTGGTGATGGTTGTCGTAGCTCGTGTGCTGA  
GATGTTGGGTTAAGTCCCGCAACGAGCGCAACCTTATCTTTAGTTGCCAGCATTAGTTGGGCACTCTA  
GAGAGACTGCCGTCGACAAGACGGAGGAAGGCGGGGATGACGTCAAATCATCATGCCCTTATGACCT  
GGGCTACACACGTGCTACAATGGTTGGTACAACGGGATGCTACTTCGCGAGAAGATGCTAATCTCTTAAA  
ACCAATCTCAGTTCGGATTGTAGGCTGCAACTCGCTACATGAAGTCGGAATCGCTAGTAATCGCGGATC  
AGCATGCCGCGGTGAATACGTTCCCGGGCCTGTACACACCGCCGTCACACCACGGGAGTTTGCAACAC  
CCGAAGTCGGTGAGGTAACCGCAAGGAGCCAGCCGC

>J23 / *Brevibacterium frigoritolerans*

TGCAGTCGAGCGAATCGATGGGAGCTTGCTCCCTGAGATTAGCGGCGGACGGGTGAGTAACACGTGGG  
CAACCTGCCTATAAGACTGGGATAACTTCGGGAAACCGGAGCTAATACCGGATACGTTCTTTCTCGCAT  
GAGAGAAGATGGAAAGACGGTTTACGCTGTCACTTATAGATGGGCCCGCGGCGCATTAGCTAGTTGGTG  
AGGTAATGGCTCACCAAGGCGACGATGCGTAGCCGACCTGAGAGGGTGATCGGCCACACTGGGACTGA  
GACACGGCCCAGACTCCTACGGGAGGCAGCAGTAGGGAATCTTCCGCAATGGACGAAAGTCTGACGGA  
GCAACGCCGCGTGAAACGAAGAAGGCCCTTCGGGTCTGAAAGTTCTGTTGTTAGGGAAGAACAAGTACCAG  
AGTAACTGCTGGTACCTTGACGGTACCTAACAGAAAGCCACGGCTAACTACGTGCCAGCAGCCGCGGT  
AATACGTAGGTGGCAAGCGTTGTCCGGAATTATTGGGCGTAAAGCGCGCGCAGGTGGTTCCTTAAGTCT  
GATGTGAAAGCCACGGCTCAACCGTGGAGGGTCATTGGAACTGGGGAACTTGAGTGCAGAAGAGGA  
AAGTGGAATTCCAAGTGTAGCGGTGAAATGCGTAGAGATTTGGAGGAACACCAGTGGCGAAGGCGACT  
TTCTGGTCTGTAACGTGACACTGAGGCGCGAAAGCGTGGGGAGCAAACAGGATTAGATACCCTGGTAGTC  
CACGCCGTAAACGATGAGTGCTAAGTGTTAGAGGGTTTCCGCCCTTAGTGCTGCAGCTAACGCATTAAG  
CACTCCGCTGGGGAGTACGGCCGCAAGGCTGAAACTCAAAGGAATTGACGGGGGGCCCGCACAAGCGG  
TGGAGCATGTGGTTTAATTCGAAGCAACGCGAAGAACCTTACCAGGTCTTGACATCCTCTGACAACCCTA  
GAGATAGGGCTTTCCCTTCGGGGGACAGAGTGACAGGTGGTGCATGGTTGTCGTCAGCTCGTGTCTGTG  
AGATGTTGGGTAAAGTCCCGCAACGAGCGCAACCCTTGATCTTAGTTGCCAGCATTAGTTGGGCACTCT  
AAGGTGACTGCCGGTGACAAACCGGAGGAAGGTGGGGATGACGTCAAATCATCATGCCCTTATGACCT  
GGGCTACACACGTGCTACAATGGATGGTACAAAGGGCTGCAAACCTGCGAAGGTAAGCGAATCCCATAA  
AGCCATTCTCAGTTCGGATTGCAGGCTGCAACTGCCTGCATGAAGCCGGAATCGCTAGTAATCGCGGAT  
CAGCATGCCGCGGTGAATACGTTCCCGGGCCTTGACACACCGCCCGTCACACCACGAGAGTTTGTAACA  
CCCGAAGTCGGTGAGGTAACCTTCATGGAGCCAGCCGCGCTA

>J25 / *Fictibacillus nanhaiensis*

ATGCAAGTCGAGCGAATGACGAGGAGCTTGCTCCTCTGATTTAGCGGCGGACGGGTGAGTAACACGTG  
GGTAATCTGCCTGTAAGACGGGGATAACTCCGGGAAACCGGGGCTAATACCGGATAACAAGAGAAGAT  
GCATATCTTCTTTTGAAGTCGGTTTCGGCTGACACTTACAGATGAGCCCGCGGCGCATTAGCTAGTTG  
GTGAGGTAACGGCTCACCAAGGCGACGATGCGTAGCCGACCTGAGAGGGTGATCGGCCACACTGGGAC  
TGAGACACGGCCCAGACTCCTACGGGAGGCAGCAGTAGGGAATCTTCGGCAATGGGCGAAAGCCTGAC  
CGAGCAACGCCGCGTGAGCGATGAAGGCCTTCGGGTCTGAAAGCTCTGTTGTTAGAGAAGAACAAGTAC  
GAGAGTAACTGCTCGTACCTTGACGGTACCTAACAGAAAGCCACGGCTAACTACGTGCCAGCAGCCGC  
GGTAATACGTAGGTGGCAAGCGTTATCCGGAATTATTGGGCGTAAAGCGCGCGCAGGCGGTCTCTTAAG  
TCTGATGTGAAAGCCACGGCTCAACCGTGGAGGGTCATTGGAACTGGGAGACTTGAGTGCAGGAGA  
GAAAAGTGGAATTCACGTGTAGCGGTGAAATGCGTAGAGATGTGGAGGAACACCAGTGGCGAAGGCG  
GCTTTTGGCCTGTAACGTGACGCTGAGGCGCGAAAGCGTGGGGAGCAAACAGGATTAGATACCCTGGTA  
GTCCACGCCGTAAACGATGAGTGCTAGGTGTTGGGGGGTTCCACCCTCAGTGCTGAAGTTAACACATTAA  
GCACTCCGCTGGGGAGTACGACCGCAAGGTTGAAACTCAAAGGAATTGACGGGGGGCCCGCACAAGCA  
GTGGAGCATGTGGTTTAATTCGAAGCAACGCGAAGAACCTTACCAGGTCTTGACATCCTCTGACCACTCT  
AGAGATAGAGCTTTCCCTTCGGGGGACAGAGTGACAGGTGGTGCATGGTTGTCGTCAGCTCGTGTCTGT  
GAGATGTTGGGTAAAGTCCCGCAACGAGCGCAACCCTTGACCTTAGTTGCCAGCATTAGTTGGGCACTC  
TAAGGTGACTGCCGGTGACAAACCGGAGGAAGGTGGGGATGACGTCAAATCATCATGCCCTTATGACC  
TGGGCTACACACGTGCTACAATGGATGGTACAAAGGGTTGCGAAGCCGCGAGGCCAAGCCAATCCCAAA  
AAGCCATTCTCAGTTCGGATTGTAGGCTGCAACTGCCTACATGAAGCCGGAATTGCTAGTAATCGCGGA  
TCAGCATGCCGCGGTGAATACGTTCCCGGGCCTTGACACACCGCCCGTCACACCACGAGAGTTTGTAAC  
ACCCGAAGTCGGTGGGGTAACCCTCTGGGAGCCAGCCGCGCAAGGTG

>J27 / *Bacillus megaterium*

AATACATGCAAAGTCGAGCGAACTGATTAGAAGCTTGCTTCTATGACGTTAGCGGCGGACGGGTGAGTA  
ACACGTGGGCAACCTGCCTGTAAGACTGGGATAACTTCGGGAAACCGAAGCTAATACCGGATAGGATCT  
TCTCCTTCATGGGAGATGATTGAAAGATGGTTTCGGCTATCACTTACAGATGGGCCCCGCGGTGCATTAGC  
TAGTTGGTGAGGTAACGGCTCACCAAGGCAACGATGCATAGCCGACCTGAGAGGGTGATCGGCCACACT  
GGGACTGAGACACGGCCCCAGACTCCTACGGGAGGCAGCAGTAGGGAATCTTCCGCAATGGACGAAAAGT  
CTGACGGAGCAACGCCGCGTGAGTGATGAAGGCTTTCGGGTCGTAAAACCTCTGTTGTTAGGGAAGAACA  
AGTACGAGAGTAACCTGCTTGACCTTGACGGTACCTAACCAGAAAGCCACGGCTAACTACGTGCCAGCA  
GCCGCGGTAATACGTAGGTGGCAAGCGTTATCCGGAATTATTGGGCGTAAAGCGCGCGCAGGCGGTTTC  
TTAAGTCTGATGTGAAAGCCCCACGGCTCAACCGTGGAGGGTCATTGGAACCTGGGGAACCTTGAGTGACG  
AAGAGAAAAAGCGGAATTCCACGTGTAGCGGTGAAATGCGTAGAGATGTGGAGGAACACCAAGTGGCGAA  
GGCGGCTTTTTGGTCTGTAACCTGACGCTGAGGCGCGAAAGCGTGGGGAGCAAACAGGATTAGATACCTT  
GGTAGTCCACGCCGTAAACGATGAGTGCTAAGTGTTAGAGGGTTTCCGCCCTTTAGTGCTGCAGCTAACG  
CATTAAAGCACTCCGCCTGGGGAGTACGGTCGCAAGACTGAAACTCAAAGGAATTGACGGGGGCCCGCAC  
AAGCGGTGGAGCATGTGGTTTAATTCGAAGCAACGCGAAGAACCCTTACCAGGTCTTGACATCCTCTGACA  
ACTCTAGAGATAGAGCGTTCCTTCGGGGGACAGAGTGACAGGTGGTGCATGGTTGTCGTGAGCTCGT  
GTCGTGAGATGTTGGGTTAAGTCCCGCAACGAGCGCAACCCTTGATCTTAGTTGCCAGCATTTAGTTGGG  
CACTCTAAGGTGACTGCCGGTGACAAACCGGAGGAAGGTGGGGATGACGTCAAATCATCATGCCCTTA  
TGACCTGGGCTACACACGTGCTACAATGGATGGTACAAAGGGCTGCAAGACCGCGAGGTCAAGCCAATC  
CCATAAAACCATTCCTCAGTTCGGATTGTAGGCTGCAACTCGCCTACATGAAGCTGGAATCGCTAGTAATC  
GCGGATCAGCATGCCGCGGTGAATACGTTCCCGGGCCTTGACACACCGCCCGTCACACCACGAGAGTTT  
GTAACACCCGAAGTCGGTGGAGTAACCGTAAGGAGCTAGCCGC



>J29 / *Pseudokineococcus basanitobidens*

ATGCAGTCGAACGGTGATGCCCCGGCTTGCCGGGGTGGATCAGTGGCGAACGGGTGAGTAACACGTGA  
GCAACCTGCCCCGACTCTGGGATAACCACCGGAAACGGTGGCTAATACCGGATATGACGGCTGGCCGC  
ATGGTCTGGTCGTGGAAAGTTTCTCGGTTGGGGATGGGCTCGCGGCCTATCAGCTTGTTGGTGGGGTGA  
TGGCCTACCAAGGCGACGACGGGTAGCCGGCCTGAGAGGGCGACCGGCCACACTGGGACTGAGACACG  
GCCCAGACTCCTACGGGAGGCAGCAGTGGGGAATATTGCGCAATGGGCGGAAGCCTGACGCAGCGACG  
CCGCGTGAGGGATGAAGGCCTTCGGGTTGTAAACCTCTTTCAGCTCCGAAGAAGCGAGAGTGACGGTAG  
GAGCAGAAGAAGCACCGGCTAACTACGTGCCACCAGCCGCGTAATACGTAGGGTGCAAGCGTTGTCC  
GGAATTATTGGGCGTAAAGAGCTCGTAGGCGGCTCGTCGCGTCTGCTGTGAAAGCCTAGGGCTTAACCC  
TGGGTCTGCAGTGGGTACGGGCGAGCTAGAGTGCGGTAGGGGAGACTGGAATTCCTGGTGTAGCGGTG  
AAATGCGCAGATATCAGGAGGAACACCGGTGGCGAAGGCGGGTCTCTGGGCCGTAACGTACGCTGAGG  
AGCGAAAGCATGGGTAGCGAACAGGATTAGATACCCTGGTAGTCCATGCCGTAAACGTTGGGCGCTAG  
GTGTGGGCGCATTCCACGTGGTCCGTGCCGAGCTAACGCATTAAGCGCCCCGCCTGGGGAGTACGGC  
CGCAAGGCTAACTCAAAGGAATTGACGGGGCCCCGCACAAGCGGCGGAGCATGCGGATTAATTCGAT  
GCAACGCGAAGAACCTTACCAAGGCTTGACATGCAGGGAAATCCTCCAGAGATGGTGGGTCCGCAAGG  
GTCCTGCGCAGGTGGTGCATGGTTGTCGTCAGCTCGTGTCTGAGATGTTGGGTAAAGTCCC GCAACGA  
GCGCAACCCTCGTTCGATGTTGCCAGCGGGTATGCCGGGGACTCATCGGAGACTGCCGGGGTCAACTC  
GGAGGAAGGTGGGGATGACGTCAAATCATCATGCCCTTATGTCTTGGGCTTCACGCATGCTACAATGG  
CCAGTACAATGGGCTGCGAGACCGTGAGGTGGAGCGAATCCAAAAAGCTGGTCTCAGTTCGGATTGG  
GGTCTGCAACTCGACCCCATGAAGTCGGAGTCGCTAGTAATCGCAGATCAGCAACGCTGCGGTGAATAC  
GTTCCCGGGGCTTGACACACCGCCCGTCACGTACGAAAGTCGGTAACACCCGAAGCCGGTGGCCCAA  
CCCCTTGTGGGAGGGAGC

>J33 / *Arthrobacter subterraneus*

CACATGCAGTCGAACGATGATCTCCAGCTTGCTGGGGGGATTAGTGGCGAACGGGTGAGTAACACGTGA  
GTAACCTGCCCTTGA CTCTGGGATAAGCCTGGGAAACTGGGTCTAATACTGGATACGACTCTTCACCGCA  
TGGTGGGGGGTGGAAAGCTTTTGTGGTTTGGATGGACTCGCGGCCTATCAGCTTGTTGGTGGGGTAAT  
GGCCTACCAAGGCGACGACGGGTAGCCGGCCTGAGAGGGTGGACGGCCACACTGGGACTGAGACACG  
GCCCAGACTCCTACGGGAGGCAGCAGTGGGGAATATTGCACAATGGGCGCAAGCCTGATGCAGCGACG  
CCGCGTGAGGGATGAAGGCCTTCGGGTTGTAAACCTCTTTCAGTAGGGAAGAAGCGAAAGTGACGGTA  
CCTGCAGAAGAAGCGCCGGCTAACTACGTGCCAGCAGCCGCGTAATACGTAGGGCGCAAGCGTTATCC  
GGAATTATTGGGCGTAAAGAGCTCGTAGGCGGTTTGTGCGCTCTGCCGTGAAAGTCCGGGGCTTAACCTC  
CGGATCTGCGGTGGGTACGGGCAGACTTGAGTGATGAGGGGAGACTGGAATTCCTGGTGTAGCGGTG  
AAATGCGCAGATATCAGGAGGAACACCGATGGCGAAGGCAGGTCTCTGGGCATTAACGTACGCTGAGG  
AGCGAAAGCATGGGGAGCGAACAGGATTAGATACCCTGGTAGTCCATGCCGTAAACGTTGGGCACTAG  
GTGTGGGGGACATTCCACGTTTTCCGCGCCGTAGCTAACGCATTAAGTGCCCCGCCTGGGGAGTACGGC  
CGCAAGGCTAAAACCTCAAAGGAATTGACGGGGGCCCGCACAAAGCGGCGGAGCATGCGGATTAATTCGA  
TGCAACGCGAAGAACCTTACCAAGGCTTGACATGAACCGGAACGGCGCAGAGATGTGTCGGCCACTTGT  
GGCCGGTTTACAGGTGGTGCATGGTTGTCGTCAGCTCGTGTCTGAGATGTTGGGTAAAGTCCC GCAAC  
GAGCGCAACCCTCGTTCATGTTGCCAGCGGGTTATGCCGGGGACTCATGGGAGACTGCCGGGGTCAAC  
TCGGAGGAAGGTGGGGACGACGTCAAATCATCATGCCCTTATGTCTTGGGCTTCACGCATGCTACAATG  
GCCGGTACAAAGGGTTGCGATGCTGTGAGGTGGAGCTAATCCAAAAAGCCGGTCTCAGTTCGGATTGA  
GGTCTGCAACTCGACCTCATGAAGTCGGAGTCGCTAGTAATCGCAGATCAGCAACGCTGCGGTGAATAC  
GTTCCCGGGCCTTGACACACCGCCCGTCAAGTCACGAAAGTTGGTAACACCCGAAGCCGGTGGCCTAAC  
CCCTTGTGGGAGGGAGCCGTCGA

>J36 / *Kocuria rosea*

TGCAGTCGAACGATGATGCCCAGCTTGCTGGGCGGATTAGTGGCGAACGGGTGAGTAATACGTGAGTA  
ACCTGCCCTTGA CTCTGGGATAAGCCTGGGAACTGGGTCTAATACTGGATACTACTTCCTGCCGCATGG  
TGGGTGGTGGAAAGGGTTTTACTGGTTTTGGATGGGCTCACGGCCTATCAGCTTGTGGTGGGGTAATG  
GCTACCAAGGCGACGACGGGTAGCCGGCCTGAGAGGGTGACCGGCCACACTGGGACTGAGACACGGC  
CCAGACTCCTACGGGAGGCAGCAGTGGGGAATATTGCACAATGGGCGGAAGCCTGATGCAGCGACGCC  
GCGTGAGGGATGACGGCCTTCGGGTTGTAAACCTCTTTCAGTAGGGAAGAAGCGAGAGTGACGGTACCT  
GCAGAAGAAGCGCCGGCTAACTACGTGCCAGCAGCCGCGGTAATACGTAGGGCGCAAGCGTTGTCCGG  
AATTATTGGGCGTAAAGAGCTCGTAGGCGGTTTGTGCGCTCTGCTGTGAAAGCCCGGGCTCAACCCCG  
GGTCTGAGTGGGTACGGGCAGACTAGAGTGCAGTAGGGGAGACTGGAATTCCTGGTGTAGCGGTGAA  
ATGCGCAGATATCAGGAGGAACACCGATGGCGAAGGCAGGTCTCTGGGCTGTTACTGACGCTGAGGAG  
CGAAAGCATGGGGAGCGAACAGGATTAGATACCCTGGTAGTCCATGCCGTAAACGTTGGGCACTAGGT  
GTGGGGGACATTCCACGTTTTCCGCGCCGTAGCTAACGCATTAAGTGCCCCGCCTGGGGAGTACGGCCG  
CAAGGCTAAAACCTCAAAGGAATTGACGGGGGCCCCGACAAGCGGCGGAGCATGCGGATTAATTCGATG  
CAACGCGAAGAACCTTACCAAAGAACCTTACCAAGGCTTGACATTCACCGGACCGCCCCAGAGATGGGG  
TTCCCTTCGGGGCTGGTGGACAGGTGGTGCATGGTTGTCGTGAGCTCGTGTGAGATGTTGGGTAA  
GTCCCGCAACGAGCGCAACCTCGTTCTATGTTGCCAGCACGTGATGGTGGGGACTCATAGGAGACTGC  
CGGGGTCAACTCGGAGGAAGGTGGGGATGACGTCAAATCATCATGCCCTTATGTCTTGGGCTTCACGC  
ATGCTACAATGGCCGGTACAAAGGGTTGCGATACTGTGAGGTGGAGCTAATCCAAAAAGCCGGTCTCA  
GTTCCGATTGAGGTCTGCAACTCGACCTCATGAAGTCGGAGTCGCTAGTAATCGCAGATCAGCAACGCT  
GCGGTGAATACGTTCCCGGGCCTTGACACACCGCCCGTCAAGTCACGAAAGTTGGTAACACCCGAAGC  
CGGTGGCCTA

>J37 / *Bacillus thioeparans*

ACATGCAAGTCGAGCGGATCTTCATTAGCTTGCTTTGAAGATCAGCGGCGGACGGGTGAGTAACACGT  
GGGCAACCTGCCTGTAAGACTGGGATAACTTCGGGAAACCGGAGCTAATACCGGATAATCCTTTCCTCA  
CATGAGGGAAAGCTGAAAGACGGTTTCGGCTGTCACTTACAGATGGGCCCCGCGCGCATTAGCTAGTTG  
GTGAGGTAACGGCTACCAAGGCAACGATGCGTAGCCGACCTGAGAGGGTGATCGGCCACACTGGGAC  
TGAGACACGGCCCCAGACTCCTACGGGAGGCAGCAGTAGGGAATCTTCCGCAATGGACGAAAGTCTGAC  
GGAGCAACGCCGCTGAACGATGAAGGCTTTCGGGTCGTAAAGTTCTGTTGTCAGGGAAGAACAAGTAC  
CGGAGTAACCTGCCGTACCTTGACGGTACCTGACCAGAAAGCCACGGCTAACTACGTGCCAGCAGCCGC  
GGTAATACGTAGGTGGCAAGCGTTGTCCGGAATTATTGGGCGTAAAGCGCGCGCAGGCGGTTCTTAAG  
TCTGATGTGAAAGCCCCCGCTCAACCGGGGAGGGTCATTGGAACTGGGGAACCTGAGTGAGAAGA  
GGAGAGCGGAATTCCACGTGTAGCGGTGAAATGCGTAGAGATGTGGAGGAACACCAAGTGGCGAAGGC  
GGCTCTCTGGTCTGTAACGTGACGCTGAGGCGCGAAAGCGTGGGGAGCGAACAGGATTAGATACCCTGGT  
AGTCCACGCCGTAAACGATGAGTGCTAAGTGTTAGAGGGTTTCCGCCCTTATGTGCTGCAGCAAACGCAT  
TAAGCACTCCGCTGGGGAGTACGGCCGCAAGGCTGAAACTCAAAGGAATTGACGGGGGGCCCCGCACAA  
GCGGTGGAGCATGTGGTTTAATTGGAAGCAACGCGAAGAACCCTTACCAGGTCTTGACATCTCTGACAAC  
CCTAGAGATAGGGCGTTCCCTTCGGGGGACAGAGTGACAGGTGGTGCATGGTTGTCGTGAGCTCGTGT  
CGTGAGATGTTGGTTAAGTCCCGCAACGAGCGCAACCTTGATCTTAGTTGCCAGCATTAGTTGGGCA  
CTCTAAGGTGACTGCCGGTGACAAACCGGAGGAAGGTGGGGATGACGTCAAATCATCATGCCCTTATG  
ACCTGGGCTACACACGTGCTACAATGGATGGAACAAAGGGTCGCGAAGCCGCGAGGTGAAGCCAATCC  
CATAAATCCATTCTCAGTTTCGGATTGCAAGCTGCACTCGCTGCATGAAGCCGGAATCGCTAGTAATCG  
CGGATCAGCATGCCGCGGTGAATACGTTCCCGGGCCTTGACACACCGCCCGTCACACCACGAGAGTTTG  
TAACACCCGAAGTCGGTGGGGTAACCTTTTGGAGCCAGCCGC



>J40 / *Bacillus sinesaloumensis*

ATACATGCAAGTCGAGCGGATCTTTGGGAGCTTGCTCCCAAAGGTTAGCGGCGGACGGGTGAGTAACAC  
GTGGGTAACTGCCTGTAAGACTGGGATAACTTCGGGAAACCGGAGCTAATACCGGATAACATATAAGA  
CCACATGGTCTTATATTTAAAAGGTGGCTTTTAGCTACCACTTACAGATGGACCCGCGGCGCATTAGCTAG  
TTGGTGAGGTAACGGCTACCAAGGCGACGATGCGTAGCCGACCTGAGAGGGTGATCGGCCCACTGG  
GACTGAGACACGGCCAGACTCCTACGGGAGGCGAGCAGTAGGGAATCTTCCGAATGGACGAAAGTCT  
GACGGAGCAACGCCGCGTGAGCGATGAAGGCCCTTCGGGTGCTAAAGCTCTGTTGTTAGGGAAGAACAA  
GTATCGTTTGAATAGGGCGGTACCTTGACGGTACCTAACAGAAAAGCCACGGCTAACTACGTGCCAGCA  
GCCGCGGTAATACGTAGGTGGCAAGCGTTATCCGGAATTATTGGGCGTAAAGCGCGCGCAGGCGGTCTT  
TTAAGTCTGATGTGAAAGCCACGGCTCAACCGTGGAGGGTCATTGGAACTGGGGGACTTGAGTGCAG  
AAGAGGAGAGCGGAATTCCACGTGTAGCGGTGAAATGCGTAGAGATGTGGAGGAACACCAAGTGGCGA  
AGGCGGCTCTCTGGTCTGTAAGTACGCTGAGGCGCGAAAGCGTGGGGAGCGAACAGGATTAGATACC  
CTGGTAGTCCACGCCGTAAACGATGAGTGCTAAGTGTTAGAGGGTTTCCGCCCTTTAGTGCTGCAGCAAA  
CGCATTAAGCACTCCGCCTGGGGAGTACGGTCGCAAGACTGAAACTCAAAGGAATTGACGGGGGCCCCG  
CACAAGCGGTGGAGCATGTGGTTTAATTCGAAGCAACGCGAAGAACCTTCCCATGTCTTGACCTCCCATG  
ACAACCTAGAGATAGGGTTTTCCCTTGGGGGACATGGTGACAGGTGGTGCATGGTTGTCGTCAGCTCG  
TGTCGTGAGATGTTGGGTAAAGTCCCGCAACGAGCGCAACCCCTTGATCTTAGTTGCCAGCATTCAGTTGG  
GCACTCTAAGGTGACTGCCGGTGACAAACCGGAGGAAGGTGGGGATGACGTCAAATCATCATGCCCTT  
ATGACCTGGGCTACACACGTGCTACAATGGATGGTACAAAGGGCAGCGAAACCGCGAGGTTAAGCAAA  
TCCCATAAAACCATTTCTAGTTCGGATTGCAGGCTGCAACTCGCCTGCATGAAGCCGGAATCGCTAGTAA  
TCGCGGATCAGCATGCCGCGGTGAATACGTTCCCGGGCCTTGACACACCGCCCGTCACACCACGAGAGT  
TTGTAACACCCGAAGTCGGTGGGGTAACCGTAAGGAGCCAGCCGC

>J42 / *Arthrobacter agilis*

GCAGAAGAAGCGCCNGGCTAACTACGTGCCAGCAGCCGCGGTAATACGTAGGGCGCAAGCGTTATCCG  
GGAATTATTGGGCGTAAAGAGCTCGTAGGCGGTTTGTGCGCTCTGCCGTGAAAGTCCGGGGCTTAACCC  
CGGATCTGCGGTGGGTACGGGCAGACTAGAGTGACAGTAGGGGAGACTGGAATTCCTGGTGTAGCGGTG  
AAATGCGCAGATATCAGGAGGAACACCGATGGCGAAGGCAGGTCTCTGGGCTGTAAGTACGCTGAGG  
AGCGAAAGCATGGGGAGCGAACAGGATTAGATACCCTGGTAGTCCATGCCGTAAACGTTGGGCACTAG  
GTGTGGGGGACATTCCACGTTTTCCGCGCCGTAGCTAACGCATTAAGTGCCCCGCTGGGGAGTACGGC  
CGCAAGGCTAAAACCTCAAAGGAATTGACGGGGGCCCCGACAAGCGGCGGAGCATGCGGATTAATTCGA  
TGCAACGCGAAGAACCTTACCAAGGCTTGACATGAACCGGAATGATGCAGAGATGTGTGAGCCACTTGT  
GGCCGTTTACAGGTGGTGCATGGTTGTCGTCAGCTCGTGTGAGATGTTGGGTAAAGTCCCGCAAC  
GAGCGCAACCCCTCGTTCCATGTTGCCAGCGGGTTATGCCGGGGACTCATGGGAGACTGCCGGGGTCAAC  
TCGGAGGAAGGTGGGGACGACGTCAAATCATCATGCCCTTATGTCTTGGGCTTACGCATGCTACAATG  
GCCGGTACAAAGGGTTGCGATACTGTGAGGTGGAGCTAATCCCAAAAAGCCGGTCTCAGTTCGGATTGA  
GGTCTGCAACTCGACCTCATGAAGTTGGAGTCGCTAGTAATCGCAGATCAGCAACGCTGCGGTGAATAC  
GTTCCCGGGCCTTGACACACCGCCCGTCAAGTCACGAAAGTTGGTAACACCCGAAGCCGGTGGCCTAAC  
CCCTTGTTGGGAGGGAGCCGTCG

>J43 / *Dietzia lutea*

CATGCAGTCGAACGGTAAGGCCCTTACAGGGGTACACGAGTGGCGAACGGGTGAGTAACACGTGGGTA  
ATCTGCCCTGCACTTCGGGATAAGCCTGGGAACTGGGTCTAATACCGGATATTCAACTTTCGCCGCATG  
GTGGTGGTTGGAAAGTTTTTCGGTGCAGGATGAGCCCGCGGCCTATCAGCTTGTTGGTGGGGTAATGGC  
CTACCAAGGCGACGACGGGTAGCCGGCCTGAGAGGGTGATCGGCCCACTGGGACTGAGACACGGCCC  
AGACTCCTACGGGAGGCAGCAGTGGGGAATATTGCACAATGGGCGGAAGCCTGATGCAGCGACGCCGC  
GTGGGGGATGACGGTCTTCGGATTGTAAACCCCTTTCAGTAGGGACGAAGCGCAAGTGACGGTACCTGC  
AGAAGAAGCACCGGCCAACTACGTGCCAGCAGCCGCGGTAATACGTAGGGTGCGAGCGTTGTCCGGAA  
TTACTGGGCGTAAAGAGCTCGTAGGCGGTTTGTACGTCGTCTGTGAAATCCTCCAGCTTAACTGGGGGC  
GTGCAGGCGATACGGGCAGACTTGAGTACTACAGGGGAGACTGGAATTCCTGGTGTAGCGGTGAAATG  
CGCAGATATCAGGAGGAACACCGGTGGCGAAGGCGGGTCTCTGGGTAGTAACTGACGCTGAGGAGCGA  
AAGCATGGGTAGCGAACAGGATTAGATACCCTGGTAGTCCATGCCGTAAACGGTGGGCGCTAGGTGTG  
GGGTCCTTCCACGGATTCCGTGCCGTAGCTAACGCATTAAGCGCCCCGCCTGGGGAGTACGGCCGCAAG  
GCTAAAACTCAAAGGAATTGACGGGGGGCCCGCACAAGCGGCGGAGCATGTGGATTAATTCGATGCAAC  
GCGAAGAACCTTACCTAGGCTTGACATATACAGGACGACGGCAGAGATGTCGTTTCCCTTGTGGCTTGT  
TACAGGTGGTGCATGGTTGTCGTCAGCTCGTGTGTCGTGAGATGTTGGGTTAAGTCCCGCAACGAGCGCAA  
CCCCTGTCTCATGTTGCCAGCACGTTATGGTGGGGACTCGTGAGAGACTGCCGGGTCAACTCGGAGGA  
AGGTGGGGATGACGTCAAATCATCATGCCCTTATGTCTAGGGCTTCACACATGCTACAATGGCTAGTAC  
AGAGGGCTGCGATACCGTGAGGTGGAGCGAATCCCTTAAAGCTGGTCTCAGTTCGGATTGGGGTCTGCA  
ACTCGACCCCATGAAGTCGGAGTCGCTAGTAATCGCAGATCAGCAACGCTGCGGTGAATACGTTCCCGG  
GCCTTGTACACACCGCCCGTCACGTCATGAAAGTCGGTAACACCCGAAGCCGGTGGCCTAACCCCNCTGT  
GGGGAGGAGCCGT

>J45 / *Georgenia satyanarayanai*

GTCGAACGATGAAGCCCAGCTTGCTGGGTGGATTAGTGGCGAACGGGTGAGTAACACGTGAGTAACCT  
GCCCCTGACTTCGGGATAACTACGAGAAATCGTGGCTAATACCGGATATGACACGTGCCTGCATGGGTG  
TGTGTGGAAAGATTTATCGGTTGGGGATGGGCTCGCGGCCTATCAGCTTGTTGGTGGGGTGATGGCCTA  
CCAAGGCGACGACGGGTAGCCGGCCTGAGAGGGTGACCGGCCACACTGGGACTGAGACACGGCCCAG  
ACTCCTACGGGAGGCAGCAGTGGGGAATATTGCACAATGGGCGCAAGCCTGATGCAGCGACGCCGCGT  
GAGGGATGACGGCCTTCGGGTTGTAAACCTCTTTCAGTAGGGAAGAAGCTCTTCGGAGTGACGGTACCT  
GCAGAAGAAGCGCCGGCTAACTACGTGCCAGCAGCCGCGTAATACGTAGGGCGCAAGCGTTGTCCGG  
AATTATTGGGCGTAAAGAGCTCGTAGGCGGTTTGTGCGCTCTGCTGTGAAAACGCAAGGCTTAACCTTGC  
GCCTGCAGTGGGTACGGGCAGACTAGAGTGCGGTAGGGGAGACTGGAATTCCTGGTGTAGCGGTGGAA  
TGCGCAGATATCAGGAGGAACACCGATGGCGAAGGCAGGTCTCTGGGCCGTTACTGACGCTGAGGAGC  
GAAAGCATGGGGAGCGAACAGGATTAGATACCCTGGTAGTCCATGCCGTAAACGTTGGGCACTAGGTGT  
GGGATCCATTCCACGGGTTCCGTGCCGCAGCTAACGCATTAAGTGCCCCGCCTGGGGAGTACGGCCGCA  
AGGCTAAAACTCAAAGGAATTGACGGGGGCCCCGACAAGCGGCGGAGCATGCGGATTAATTCGATGCA  
ACGCGAAGAACCTTACCAAGGCTTGACATACACCGGAAAAGTGCAAGATGTGCTCCCCGTAAGGTCGG  
TGTACAGGTGGTGCATGGTTGTCGTGAGCTCGTGTGAGATGTTGGGTTAAGTCCCGCAACGAGCGC  
AACCTTGTCTGTGTTGCCAGCACGTAATGGTGGGGACTCATAGGAGACTGCCGGGGTCAACTCGGAG  
GAAGGTGGGGATGACGTCAAATCATCATGCCCTTATGTCTTGGGCTTCACGCATGCTACAATGGCCGGT  
ACAAAGGGCTGCGATACCGCGAGGTGGAGCGAATCCCCAAAAGCCGGTCTCAGTTCGGATTGGGGTCT  
GCAACTCGACCCCATGAAGTCGGAGTCGCTAGTAATCGCAGATCAGCAACGCTGCGGTGAATACGTTCTC  
  
GGGCCTTGACACACCGCCCGTCACGTCATGAAAGTCGGTAACACCCGAAGCCGGTGGCCCAACCCCTTG  
TGGGAGGGAGCTG



>J46 / *Bacillus fermenti*

ATACATGCAGTCGAGCGGACTTTTAAAAGCTTGCTTCTCAAAAGTTAGCGGCGGACGGGTGAGTAACAC  
GTGGGCAACCTGCCTGTAAGACTGGGATAACTCCGGGAAACCGGGGCTAATACCGGATAATTTCATTCCT  
CTCATGAGGGAATGCTGAAAGACGGTTTCGGCTGTCACTTACAGATGGGCCCGCGGCATTAGCTAGT  
TGGTGAGGTAACGGCTACCAAGGCCACGATGCGTAGCCGACCTGAGAGGGTGATCGGCCACACTGGG  
ACTGAGACACGGCCAGACTCCTACGGGAGGCAGCAGTAGGGAATCTTCGCAATGGACGAAAGTCTG  
ACGGAGCAACGCCGCTGAGCGATGAAGGCCTTCGGGTCGTAAAGCTCTGTTGTTAGGGAAGAACAAG  
TACCGGAGTAAGTCCGGTACCTTGACGGTACCTAACCCAGAAAGCCACGGCTAACTACGTGCCAGCAGC  
CGCGGTAATACGTAGGTGGCAAGCGTTGTCCGGAATTATTGGGCGTAAAGCGCGCGCAGGTGGTCTTT  
AAGTCTGATGTGAAAGCCACGGCTCAACCGTGGAGGGTCATTGGAACTGGGGAAGTTCAGTGCAGA  
AGAGGAAAGTGGAATTCACGTGTAGCGGTGAAATGCGTAGAGATGTGGAGGAACACCAAGTGGCGAA  
GGCGACTTTCTGGTCTGTAAGTACACTGAGGCGCGAAAGCGTGGGGAGCGAACAGGATTAGATACCTT  
GGTAGTCCACGCCGTAACGATGAGTGCTAAGTGTTAGAGGGTTTCGCCCTTTAGTGTCTGACGAAAC  
GCATTAAGCACTCCGCTGGGGAGTACGGCCGCAAGGCTGAAACTCAAAGGAATTGACGGGGGGCCGC  
ACAAGCGGTGGAGCATGTGGTTTAATTGCAAGCAACGCGAAGAACCCTTACCAGGTCTTGACATCCTCTGA  
CACCTCTGGAGACAGAGCGTTCCCTTCGGGGGACAGAGTGACAGGTGGTGCATGGTTGTCGTCAGCTC  
GTGTCGTGAGATGTTGGGTTAAGTCCCGCAACGAGCGCAACCCTTGTCCTTAGTTGCCAGCATTAGTTG  
GGCACTATAAGGAGACTGCCGGTGACAAACCGGAGGAAGGTGGGGATGACGTCAAATCATATGCCCC  
TTATGACCTGGGCTACACACGTGCTACAATGGATAGAACAAAGGGCAGCGAAGCCGCGAGGTGAAGCA  
AATCCATAAATCTATTCTCAGTTCGGATTGCAGGCTGCAACTCGCCTGCATGAAGCCGGAATCGCTAGT  
AATCGCGGATCAGCATGCCGCGGTGAATACGTTCCCGGGCCTTGACACACCGCCCGTCACACCACGAG  
AGTTTGTAACACCCGAAGTCGGTGGGGTAACCTTTAGGGGCCAGCCGCCT

>J50 / *Fictibacillus phosphorivorans*

TCGAGCGNATCGACGAGGAGCTTGCTCCTCTGATTTACGGCGGACGGGTGAGTAACACGTGGGTAATCT  
GCCTGTAANACGGGGATAACTCCGGGAAACCGGGGCTAATACCGGATAACAAGAGAAGATGCATATCTT  
CTTTTGAAGTCGGTTTCGGCTGACACTTACAGATGAGCCCGCGGCATTAGCTAGTTGGTGAGGTAA  
CGGCTACCAAGGCGACGATGCGTAGCCGACCTGAGAGGGTGATCGGCCACACTGGGACTGAGACACG  
GCCAGACTCCTACGGGAGGCAGCAGTAGGGAATCTTCGGCAATGGGCGAAAGCCTGACCGAGCAACG  
CCGCGTGAGCGATGAAGGCCTTCGGGTCGTAAAGCTCTGTTGTTAGAGAAGAACAAGTACCAGAGTAAC  
TGCTCGTACCTTGACGGTACCTAACCCAGAAAGCCACGGCTAACTACGTGCCAGCAGCCGCGGTAATACGT  
ACGTGGCAAGCGTTATCCGGAATTATTGGGCGTAAAGCGCGCGCAGGCGGTCTCTTAAGTCTGATGTGA  
AAGCCACGGCTCAACCGTGGAGGGTCATTGGAACTGGGAGACTTGAGTGCAGGANAGAAAAGTGGA  
ATTCCACGTGTAGCGGTGAAATGCGTANAGATGTGGAGGAACACCAAGTGGCGAACCGCGCTTTTTGGCC  
TGTAAGTACGCTGAGGCGCGAAAGCGTGGGGAGCAAACAGGATTAGATACCTTGGTAGTCCACGCCG  
TAAACGATGAGTGCTAGGTGTTGGGGGGTTCCACCCTCAGTGCTGAAGTTAACACATTAAGCACTCCGCC  
TGGGGAGTACGACCGCAAGGTTGAAACTCAAAGGAATTGACGGGGGGCCGCACAAGCAGTGGAGCATG  
TGTTTAATTCGAAGCAACGCGAAGAACCCTTACCAGGTCTTGACATCCTCTGACCACTCTAGAGATAGAG

>J52 / *Salinibacterium xinjiangense*

GAACGATGAAGCTGGAGCTTGCTCTGGTGGATTAGTGGCGAACGGGTGAGTAACACGTGAGTAACCTG  
CCCCTGACTCTGGGATAAGCGCTGGAAACGGCGTCTAATACCGGATACGAGCTTCCACCGCATGGTGAG  
GAGTTGGAAAGAATTCGGTCTGGGATGGACTCGCGCCTATCAGCTTGTTGGTGAGGTAACGGCTCAC  
CAAGGCGACGACGGGTAGCCGGCCTGAGAGGGTGACCGGCCACACTGGGACTGAGACACGGCCAGA  
CTCCTACGGGAGGCAGCAGTGGGGAATATTGCACAATGGGCGCAAGCCTGATGCAGCAACGCCGCGTG  
AGGGATGACGGCCTTCGGGTTGTAAACCTCTTTTAGTAGGGAAGAAGCGAAAGTGACGGTACCTGCAGA  
AAAAGCACCGGCTAACTACGTGCCAGCAGCCGCGGTAATACGTAGGGTGCAAGCGTTATCCGGAATTAT  
TGGGCGTAAAGAGCTCGTAGGCGGTTTGTGCGCTCTGCTGTGAAACTGGAGGCTCAACCTCCAGCCTG  
CAGTGGGTACGGGCAGACTAGAGTGCGGTAGGGGAGATTGGAATTCCTGGTGAGCGGTGGAATGCGC  
AGATATCAGGAGGAACACCGATGGCGAAGGCAGATCTCTGGGCCGTAACGTGACGCTGAGGAGCGAAAG  
CATGGGGAGCGAACAGGATTAGATACCTGGTAGTCCATGCCGTAAACGTTGGGAACTAGATGTAGGG  
ACCATTCCACGGTTTTCTGTGTCGAGCTAACGCATTAAGTTCCCCGCCTGGGGAGTACGGCCGCAAGGC  
TAAAACTCAAAGGAATTGACGGGGGCCCGCACAAAGCGCGGAGCATGCGGATTAATTCGATGCAACGC  
GAAGAACCTTACCAAGGCTTGACATATACGAGAACGGGCCAGAAATGGTCAACTCTTTGGACACTCGTA  
AACAGGTGGTGTCATGGTTGTCGTCAGCTCGTGTCTGAGATGTTGGGTTAAGTCCCGCAACGAGCGCAA  
CCCTCGTCGTATGTTGCCAGCACGTGATGGTGGGAACTCATATGAGACTGCCGGGGTCAACTCGGAGGA  
AGGTGGGGATGACGTCAAATCATCATGCCCTTATGTCTTGGGCTTACGCATGCTACAATGGCCGGTAC  
AAAGGGGTGCAATACCGTAAGGTGGAGCGAATCCAAAAAGCCGGTCTCAGTTCCGATTGAGGTCTGCA  
ACTCGACCTCATGAAGTCGGAGTCGCTAGTAATCGCAGATCAGCAACGCTGCGGTGAATACGTTCCCGG  
GCCTTGACACACCGCCCGTCAAGTCATGAAAGTCGGTAACACCCGAAGCCAGTGCCCCAACCGCAAGG  
AGGGAGCTT

> J53 / *Arthrobacter oryzae*

CATGCAGTCGAACGATGATCCCCAGCTTGCTGGGGTGATTAGTGGCGAACGGGTGAGTAACACGTGAGT  
AACCTGCCCTTAACTCTGGGATAAGCCTGGGAAACTGGGTCTAATACCGGATATGACTTCTCATCGCATG  
GTGGGGGGTGGAAGCTTTTTGTGGTTTTGGATGGACTCGCGGCCTATCAGCTTGTTGGTGAGGTAATG  
GCTTACCAAGGCGACGACGGGTAGCCGGCCTGAGAGGGTGACCGGCCACACTGGGACTGAGACACGGC  
CCAGACTCCTACGGGAGGCAGCAGTGGGGAATATTGCACAATGGGCGCAAGCCTGATGCAGCGACGCC  
GCGTGAGGGATGACGGCCTTCGGGTTGTAAACCTCTTTCAGTAGGGAAGAAGCGAAAGTGACGGTACCT  
GCAGAAGAAGCGCCGGCTAACTACGTGCCAGCAGCCGCGGTAATACGTAGGGCGCAAGCGTTATCCGG  
AATTATTGGGCGTAAAGAGCTCGTAGGCGGTTTGTGCGCTCTGCCGTGAAAGTCCGGGGCTCAACTCCG  
GATCTGCGGTGGGTACGGGCAGACTAGAGTGATGTAGGGGAGACTGGAATTCCTGGTGAGCGGTGAA  
ATGCGCAGATATCAGGAGGAACACCGATGGCGAAGGCAGGTCTCTGGGCATTAACGTGACGCTGAGGAG  
CGAAAGCATGGGGAGCGAACAGGATTAGATACCCTGGTAGTCCATGCCGTAAACGTTGGGCACTAGGT  
GTGGGGGACATTCCACGTTTTCCGCGCCGTAGCTAACGCATTAAGTGCCCCGCCTGGGGAGTACGGCCG  
CAAGGCTAAAACTCAAAGGAATTGACGGGGGCCCGCACAAAGCGGCGGAGCATGCGGATTAATTCGATG  
CAACGCGAAGAACCTTACCAAGGCTTGACATGGACCGGACCGGGCTGGAAACAGTCCTTCCCCTTTGGG  
GCCGGTTCACAGGTGGTGTCATGGTTGTCGTCAGCTCGTGTCTGAGATGTTGGGTTAAGTCCCGCAACG  
AGCGCAACCCTCGTTCTATGTTGCCAGCACGTGATGGTGGGGACTCATAGGAGACTGCCGGGGTCAACT  
CGGAGGAAGGTGGGGACGACGTCAAATCATCATGCCCTTATGTCTTGGGCTTACGCATGCTACAATG  
GCCGGTACAAAGGGTTGCGATACTGTGAGGTGGAGCTAATCCAAAAAGCCGGTCTCAGTTCGGATTGG  
GGTCTGCAACTCGACCCCATGAAGTCGGAGTCGCTAGTAATCGCAGATCAGCAACGCTGCGGTGAATAC  
GTTCCCGGGCCTTGACACACCGCCCGTCAAGTCACGAAAGTTGGTAACACCCGAAGCCGGTGGTCCTAA  
CCCCTTGTTGGGAGGGAGCTGT

>J56 / *Paenisporsarcina indica*

ATACATGCAAGTCGAGCGGAATGATGAAGAAGCTTGCTTCTTCTGATTTTAGCGGCGGACGGGTGAGTA  
ACACGTGGGCAACCTACCTTGTAGATTGGGATAACTCCGGGAAACCGGGGCTAATACCGAATAATCCATT  
TCGCTTCATGGCGGAATGTTAAAAGGCGGCGCAAGCTGTCACTGCAAGATGGGCCCGCGGCGCATTAGC  
TAGTTGGTAGGGTAACGGCCTACCAAGGCGACGATGCGTAGCCGACCTGAGAGGGTGATCGGCCACAC  
TGGGACTGAGACACGGCCCGAGACTCCTACGGGAGGCGAGCAGTAGGGAATCTTCCACAATGGACGAAAG  
TCTGATGGAGCAACGCCGCGTGAGTGAAGAAGGTTTTTCGGATCGTAAAACTCTGTTGTAAGGGAAGAAC  
ACGTACGAGAGTAAGTCTGCTACCTTGACGGTACCTTATTAGAAAGCCACGGCTAACTACGTGCCAGCA  
GCCGCGGTAATACGTAGGTGGCAAGCGTTGTCCGGAATTATTGGGCGTAAAGCGCGCGCAGGCGGTCC  
TTTAAGTCTGATGTGAAAGCCCACGGCTCAACCGTGGAGGGTCATTGGAAACTGGGGGACTTGAGTGCA  
GAAGAGGAAAGCGGAATTCCACGTGTAGCGGTGAAATGCGTAGAGATGTGGAGGAACACCAGTGGCG  
AAGGCGGCTTTCTGGTCTGTAAGTACGCTGAGGCGCGAAAGCGTGGGGAGCAAACAGGATTAGATAC  
CCTGGTAGTCCACGCCGTAAACGATGAGTGCTAAGTGTTAGGGGGTTTCCGCCCTTAGTGCTGCAGCTA  
ACGCATTAAGCACTCCGCCTGGGGAGTACGGCCGCAAGGCTGAAACTCAAAGGAATTGACGGGGGCC  
GCACAAGCGGTGGAGCATGTGGTTTAATTGGAAGCAACGCGAAGAACCTTACCAGGTCTTGACATCCCA  
CTGACCGGTTTAGAGATAAGCCTTCCCTTCGGGGACAGTGGTGACAGGTGGTGATGGTTGTCGTGAG  
CTCGTGCTGAGATGTTGGTTAAGTCCCGCAACGAGCGCAACCCTTGATCTTAGTTGCCAGCATTGAG  
TTGGGCACTCTAAGGTGACTGCCGGTGACAAACCGGAGGAAGGTGGGGATGACGTCAAATCATCATGCC  
CCTTATGACCTGGGCTACACACGTGCTACAATGGACGATACAAAGGGTCGCTAACCCGCGAGGGGGAGC  
CAATCCCATAAAATCGTTCTCAGTTCGGATTGTAGGCTGCAACTCGCCTACATGAAGCCGGAATCGCTAG  
TAATCGCGGATCAGCATGCCGCGGTGAATACGTTCCCGGGCCTTGTACACACCGCCCGTCACACCACGAG  
AGTTTGTAACACCCGAAGTCGGTGAGGTAACCTTTTAGGAGCCAGCCGCCGAAGG
