# Supplementary material for: Endophytic Bacteria Colonizing the Petiole of the Desert Plant Zygophyllum dumosum Boiss: Possible Role in Mitigating Stress
Source: Plants (Basel). 2022 Feb 11;11(4):484. doi: 10.3390/plants11040484 (PMC8924888; doi:10.3390/plants11040484)
Supplement: Supplementary file 1 [file plants-11-00484-s001.zip › Table S1.xlsx]

## Sheet: Sheet1
Table S1 : Relative abundance (based on peak area) of primary metabolites in endophytes grown in control Nutrient Broth (NB) or in NB supplemented with petiole extract (NB+PE).
Kocurea rosea	Glycine, N,N-dimethyl	Lactic acid	Alanine	Hydroxylamine	Leucine	Isoleucine	Phosphoric acid monomethyl ester	Valine	Ethanolamine	2-Piperidinecarboxylic acid	Norleucine	Phosphoric acid	Threonine	Proline	Glycine	Nicotinic acid	Succinic acid	Lumichrome	Uracil	Fumaric acid	Serine	Thymine	Glutaric acid	Aspartic acid	Glycinamide	Cysteamine	Malic acid	Nicotinamide	Methionine	Pyroglutamic acid	Butanoic acid, 4-amino-	Glutamic acid	Anthranilic acid	Valeric acid, 5-amino-	Phenylalanine	Lyxose	Rhamnose	Glycerol-2-phosphate	Ornithine	Glyceric acid-3-phosphate	Citric acid	Arginine [-NH3]	Galactose_1_	beta-D-Allose	Viburnitol	Putrescine	Adenine	Glucopyranose, D-	Tyrosine
NB1	0.0938574	0.263289	1.02102	0.0107676	0.227339	0.12276	0.00280267	0.248977	0.0384214	0.01092	0.120899	1.80377	0.0663631	0.477493	0.403519	0.00478245	0.10802	0.0389799	0.01466	0.01384	0.00198437	0.00468844	0.00234	0.59388	0.00869784	0.00251421	0.00414	0.00184	0.01536	2.56206	0.4718	1.47278	4e-05	0.03834	0.0136535	0.00388	0.0524162	0.00320374	0.07604	0.00305645	0.00204401	0.00101653	0.00381173	0.00168	0.0127647	0.330542	0.0105	0.0348356	0.1221
NB2	0.0850521	0.264181	0.62074	0.0157289	0.242699	0.134987	0.00223236	0.205835	0.0229647	0.01008	0.0919479	1.60928	0.0606017	0.30971	0.343871	0.00368101	0.10614	0.048925	0.01934	0.0091	0.00137867	0.00433474	0.00236	0.51992	0.00960272	0.00267546	0.00256	0.00166	0.01352	2.57658	0.445398	1.47204	4e-05	0.03784	0.0126081	0.00376	0.0532947	0.00288443	0.0616	0.0019897	0.0011504	0.000535278	0.00347257	0.00132	0.00951214	0.255371	0.01046	0.0280991	0.09928
NB3	0.08592	0.268943	1.03314	0.0121343	0.167034	0.0902765	0.00247371	0.117727	0.0280044	0.01046	0.0679257	1.73221	0.0539206	0.336653	0.284363	0.00442218	0.10608	0.0383747	0.0169	0.01568	0.00241301	0.00424069	0.00138	0.4228	0.00729333	0.0023054	0.00608	0.00178	0.01336	2.4339	0.460311	1.41774	6e-05	0.03764	0.0138	0.00388	0.0508552	0.00264279	0.06126	0.0018765	0.00221272	0.00154683	0.0133719	0.00348	0.00748649	0.212508	0.01028	0.0379491	0.13986
SD (standard deviation)	0.00434031	0.00271882	0.209903	0.00229212	0.035773	0.0206677	0.000256051	0.0598338	0.0070505	0.000376227	0.0237243	0.0879849	0.00556953	0.0805919	0.0532883	0.000502302	0.000986685	0.00529884	0.0020936	0.00303644	0.000464826	0.000211163	0.000500986	0.0767426	0.00104082	0.00016595	0.00157693	8.19756e-05	0.000994062	0.0702314	0.0118403	0.0282334	1.0328e-05	0.00032249	0.000581375	6.19677e-05	0.00110511	0.000251666	0.0075461	0.000582299	0.000510623	0.000452559	0.00502669	0.00103507	0.00238163	0.0534416	0.000104817	0.0045033	0.0181949
Average	0.0882765	0.265471	0.891633	0.0128769	0.212357	0.116008	0.00250291	0.190846	0.0297968	0.0104867	0.0935907	1.71509	0.0602951	0.374619	0.343917	0.00429521	0.106747	0.0420932	0.0169667	0.0128733	0.00192535	0.00442129	0.00202667	0.5122	0.00853129	0.00249836	0.00426	0.00176	0.01408	2.52418	0.45917	1.45419	4.66667e-05	0.03794	0.0133539	0.00384	0.0521887	0.00291032	0.0663	0.00230755	0.00180238	0.00103288	0.00688539	0.00216	0.00992109	0.26614	0.0104133	0.033628	0.120413
NB+PE1	0.100775	0.645842	1.7808	0.0248654	0.372969	0.214607	0.612092	0.361551	0.0145195	0.00921583	0.13653	1.46479	0.195208	0.95668	1.91841	0.00779836	0.09758	0.111441	0.04524	0.00736	0.00365407	0.0117195	0.00312	0.629701	0.0170003	0.00493795	0.00524	6e-05	0.00948	5.05832	0.69482	2.93884	0.00122	0.09586	0.0336472	0.01526	0.217146	0.00378	0.08756	0.000870863	0.00066913	0.00195435	0.00872518	0.00408	0.0305654	0.817543	0.02066	0.0695841	0.09492
NB+PE2	0.100775	0.568078	1.64156	0.0199547	0.319547	0.185264	0.53964	0.375559	0.0117842	0.0090032	0.148964	1.27081	0.189348	0.871391	1.69684	0.00687808	0.09762	0.047243	0.02584	0.00666	0.0042105	0.00806824	0.00246	0.657601	0.0125681	0.00309087	0.00448	6e-05	0.00972	4.50866	0.692773	2.99522	0.00126	0.09962	0.0339	0.0151	0.20654	0.0037	0.08864	0.000418075	0.000450094	0.00659428	0.00779801	0.00314	0.0321565	0.637205	0.02064	0.0525718	0.09344
NB+PE3	0.101773	0.616166	1.80282	0.0171002	0.351502	0.208423	0.606583	0.451158	0.0147994	0.0106344	0.189269	1.35511	0.203983	1.06993	1.97919	0.0081447	0.09558	0.0916732	0.02844	0.00722	0.00474281	0.010082	0.00298	0.702815	0.0159334	0.00370431	0.00474	0.0001	0.00986	4.50234	0.73623	2.92424	0.0013	0.09958	0.0337698	0.01524	0.215911	0.0052	0.09114	0.00111821	0.000612051	0.0123439	0.00966304	0.00362	0.0328119	0.685336	0.02064	0.054915	0.09204
SD	0.000515473	0.0351006	0.0782112	0.00351303	0.024044	0.013835	0.0360761	0.0431136	0.00149003	0.000793144	0.0246591	0.0869976	0.00658773	0.0890832	0.132922	0.000585514	0.00104328	0.0294078	0.00941885	0.0003313	0.00048694	0.00163577	0.000311041	0.0330017	0.00206907	0.00084142	0.000345485	2.06559e-05	0.000171891	0.285489	0.0219313	0.0335292	3.57771e-05	0.00193141	0.000113089	7.79744e-05	0.00518748	0.000754789	0.00164247	0.000317572	0.00010163	0.00465518	0.00083407	0.000420412	0.00103331	0.0835204	1.0328e-05	0.00824697	0.00128814
Average	0.101107	0.610028	1.74173	0.0206401	0.348006	0.202765	0.586105	0.396089	0.013701	0.00961779	0.158254	1.36357	0.19618	0.966001	1.86482	0.00760704	0.0969267	0.0834523	0.0331733	0.00708	0.00420246	0.00995658	0.00285333	0.663372	0.0151673	0.00391104	0.00482	7.33333e-05	0.00968667	4.68977	0.707941	2.95277	0.00126	0.0983533	0.0337723	0.0152	0.213199	0.00422667	0.0891133	0.000802383	0.000577092	0.00696419	0.00872874	0.00361333	0.0318446	0.713361	0.0206467	0.0590236	0.0934667
Bavibacterium frigoritolerans	Glycine, N,N-dimethyl	Lactic acid	Alanine	Hydroxylamine	Leucine	Isoleucine	Phosphoric acid monomethyl ester	Valine	Ethanolamine	2-Piperidinecarboxylic acid	Norleucine	Phosphoric acid	Threonine	Proline	Glycine	Nicotinic acid	Succinic acid	Lumichrome	Uracil	Fumaric acid	Serine	Thymine	Glutaric acid	Aspartic acid	Glycinamide	Cysteamine	Malic acid	Nicotinamide	Methionine	Pyroglutamic acid	Butanoic acid, 4-amino-	Glutamic acid	Anthranilic acid	Valeric acid, 5-amino-	Phenylalanine	Lyxose	Rhamnose	Glycerol-2-phosphate	Ornithine	Glyceric acid-3-phosphate	Citric acid	Arginine [-NH3]	Galactose_1_	beta-D-Allose	Viburnitol	Putrescine	Adenine	Glucopyranose, D-	Tyrosine
NB1	0.0271917	0.0332769	0.435933	0.00430388	0.0842805	0.0211536	0.00288937	0.121668	0.00183877	0.255083	0.0803114	1.94754	0.0249675	0.0702882	0.211613	0.000691934	0.0676167	0.0634708	0.032775	0.0905083	0.00677207	0.0111857	0.00964167	0.0225241	0.0430046	0.0049	0.000991667	0.0120917	0.011875	1.61894	0.178375	1.13361	0.00455	0.0121058	0.0258193	0.0599	0.0234969	0.00886088	0.033125	0.0259048	0.00148489	0.00520179	0.0125831	0.000908333	0.00112083	0.156928	0.07275	0.00880566	0.0832
NB2	0.02775	0.0252596	0.4653	0.00354292	0.0811131	0.0227329	0.00371798	0.124643	0.00183877	0.254317	0.0797004	2.145	0.024778	0.0805321	0.20961	0.000691934	0.0720417	0.0679709	0.0333583	0.104858	0.00716807	0.0172308	0.012175	0.0273254	0.0506144	0.00445833	0.000816667	0.0137583	0.0116917	1.61271	0.172069	1.13271	0.00388333	0.0120667	0.0261583	0.0603833	0.0238803	0.0114442	0.0377083	0.0282864	0.00142603	0.0136737	0.016058	0.001075	0.00114938	0.0888773	0.0739833	0.00854211	0.0646
NB3	0.02775	0.0300735	0.400433	0.00236207	0.0878117	0.0298801	0.00286547	0.139725	0.00183877	0.106808	0.0903715	1.99498	0.0275827	0.0677752	0.270891	0.000656175	0.0675333	0.0666165	0.037225	0.092325	0.00786739	0.020675	0.00460833	0.0203039	0.0463544	0.00358333	0.00085	0.0138167	0.011425	1.61701	0.162908	1.09748	0.00385	0.00910833	0.0262375	0.0629583	0.0226996	0.01587	0.0498083	0.0153007	0.00122295	0.0138171	0.0132702	0.0007	0.00116433	0.0523123	0.0731917	0.00323285	0.0833583
SD	0.000288322	0.00360951	0.0290524	0.000875147	0.0029972	0.00415897	0.000434196	0.00865924	0	0.0763717	0.00535976	0.0921938	0.001402	0.00604423	0.0311412	1.84659e-05	0.00230688	0.00206495	0.00216314	0.00698863	0.000496061	0.00429653	0.00344493	0.00321006	0.00341134	0.000599367	8.31109e-05	0.000876113	0.000202393	0.00285382	0.00695627	0.0184269	0.000353187	0.00153789	0.000198692	0.00147049	0.000538721	0.00317045	0.00770931	0.0061833	0.00012292	0.00441236	0.00164596	0.00016805	1.9769e-05	0.0474865	0.000558917	0.00281221	0.00964614
Average	0.0275639	0.0295367	0.433889	0.00340296	0.0844018	0.0245889	0.00315761	0.128679	0.00183877	0.205403	0.0834611	2.02917	0.0257761	0.0728652	0.230705	0.000680014	0.0690639	0.0660194	0.0344528	0.0958972	0.00726918	0.0163638	0.00880833	0.0233844	0.0466578	0.00431389	0.000886111	0.0132222	0.0116639	1.61622	0.171118	1.12127	0.00409444	0.0110936	0.0260717	0.0610806	0.023359	0.0120584	0.0402139	0.023164	0.00137796	0.0108975	0.0139704	0.000894444	0.00114485	0.0993725	0.0733083	0.00686021	0.0770528
NB+PE1	0.00226728	0.11047	0.124058	0.00890308	0.0484625	0.0209167	0.22228	0.0225586	0.00514182	0.00594167	0.019809	1.25405	0.00661731	0.00299124	0.146942	0.0458884	0.039	0.0853558	0.198608	0.022825	0.000914757	0.0500772	0.000925	0.005675	0.011178	0.00295986	0.00139167	0.0117833	0.004275	0.431975	0.0445167	0.557542	0.0105417	0.00590833	0.00945	0.573083	0.0219889	0.0143607	0.00163333	0.00126646	0.000673233	0.000253101	0.0148374	0.0008	0.000239267	0.136405	0.00765833	0.00495226	0.0678083
NB+PE2	0.00240477	0.111222	0.203208	0.00434601	0.0940567	0.0318281	0.259946	0.0563909	0.00347957	0.0294083	0.0582259	1.30882	0.00970135	0.0134931	0.185281	0.0467319	0.0473833	0.0948631	0.197942	0.0520167	0.00235626	0.0622375	0.0278833	0.0079	0.0107008	0.00456773	0.000841667	0.0103583	0.00568333	1.23996	0.0445167	0.773	0.0233	0.013725	0.0191	0.545483	0.0241775	0.0236909	0.0226417	0.00206787	0.000724931	0.00107832	0.0150624	0.0009	0.000239267	0.140139	0.00760833	0.00284882	0.1036
NB+PE3	0.00226728	0.0965769	0.198517	0.00885615	0.0724366	0.0276231	0.250687	0.0334065	0.00293625	0.0288167	0.0349388	1.4786	0.0078386	0.00908034	0.15149	0.0330499	0.047075	0.0977994	0.219317	0.0527417	0.00120488	0.0660167	0.019925	0.007125	0.0114632	0.00436348	0.000925	0.0110083	0.00474167	1.20315	0.0536583	0.772408	0.023475	0.0126167	0.019275	0.572958	0.0221972	0.0166425	0.01635	0.0020864	0.000350927	0.00139161	0.0138505	0.0009	0.000239267	0.102039	0.00771667	0.00489313	0.09425
SD	7.10016e-05	0.00737635	0.039717	0.00234124	0.0203994	0.00492229	0.0175552	0.0154514	0.0010278	0.0119683	0.0173092	0.104721	0.00138913	0.00471647	0.0187347	0.00685792	0.00425176	0.00581785	0.01087	0.0152651	0.000681938	0.00744957	0.0123886	0.0010102	0.00034457	0.000782912	0.000265135	0.000638096	0.000641656	0.408069	0.00472074	0.11111	0.00663402	0.00378295	0.00502903	0.0142204	0.00108041	0.0043503	0.00964376	0.00041871	0.000181267	0.000526033	0.000576565	5.16398e-05	0	0.018785	4.84962e-05	0.00107127	0.0166037
Average	0.00231311	0.10609	0.175261	0.00736841	0.0716519	0.0267893	0.244304	0.037452	0.00385255	0.0213889	0.0376579	1.34716	0.00805242	0.00852155	0.161238	0.0418901	0.0444861	0.0926728	0.205289	0.0425278	0.00149197	0.0594438	0.0162444	0.0069	0.011114	0.00396369	0.00105278	0.01105	0.0049	0.958361	0.0475639	0.700983	0.0191056	0.01075	0.0159417	0.563842	0.0227878	0.0182314	0.0135417	0.00180691	0.00058303	0.000907675	0.0145834	0.000866667	0.000239267	0.126194	0.00766111	0.0042314	0.0885528
Arthrobactor agilis	Glycine, N,N-dimethyl	Lactic acid	Alanine	Hydroxylamine	Leucine	Isoleucine	Phosphoric acid monomethyl ester	Valine	Ethanolamine	2-Piperidinecarboxylic acid	Norleucine	Phosphoric acid	Threonine	Proline	Glycine	Nicotinic acid	Succinic acid	Lumichrome	Uracil	Fumaric acid	Serine	Thymine	Glutaric acid	Aspartic acid	Glycinamide	Cysteamine	Malic acid	Nicotinamide	Methionine	Pyroglutamic acid	Butanoic acid, 4-amino-	Glutamic acid	Anthranilic acid	Valeric acid, 5-amino-	Phenylalanine	Lyxose	Rhamnose	Glycerol-2-phosphate	Ornithine	Glyceric acid-3-phosphate	Citric acid	Arginine [-NH3]	Galactose_1_	beta-D-Allose	Viburnitol	Putrescine	Adenine	Glucopyranose, D-	Tyrosine
NB1	0.101	0.05	0.82	0.012	0.17	0.2	0.003	0.58	0.005	0.009	0.09	1.68	0.102	0.4	0.857	0.0035	0.11	0.037	0.014	0.006	0.0665	0.0054	0.0037	0.347	0.00792	0.0019	0.00144	0.000375	0.0365	2.3	0.054	1.089	0.00047	0.158	0.01038	0.004	0.0220149	0.0011748	0.066	0.000220682	0.00940878	0.000978937	0.0101204	0.00233333	0.00930824	0.964924	0.007	0.0435115	0.084
NB2	0.095	0.04	0.82	0.011	0.15	0.19	0.004	0.52	0.006	0.008	0.07	1.67	0.098	0.32	0.793	0.0032	0.12	0.043	0.013	0.005	0.0392	0.0059	0.0039	0.337	0.0088	0.0023	0.00173	0.000383333	0.0343	2.4	0.594	1.098	0.00048	0.1418	0.01066	0.004	0.0220149	0.0018	0.044	0.00140552	0.00615798	0.000955381	0.00847744	0.00200833	0.0107841	0.818647	0.006	0.0468011	0.088
NB3	0.095	0.05	0.64	0.01	0.19	0.2	0.002	0.67	0.003	0.008	0.09	1.61	0.083	0.31	0.522	0.0032	0.12	0.054	0.008	0.005	0.1385	0.0034	0.001	0.302	0.01023	0.0021	0.00167	0.000341667	0.0346	2.3	0.632	1.084	0.00049	0.1423	0.01021	0.004	0.0207576	0.001275	0.049	0.000296922	0.0387899	0.00167215	0.0155666	0.00526667	0.011158	1.12598	0.003	0.0667405	0.123
SD	0.00309839	0.00516398	0.0929516	0.000894427	0.0178885	0.00516398	0.000894427	0.0675278	0.00136626	0.000516398	0.010328	0.0338625	0.00895917	0.044121	0.159065	0.000154919	0.00516398	0.00771146	0.00287518	0.000516398	0.0458836	0.00118322	0.00144868	0.0211345	0.00104278	0.000178885	0.000136918	1.972e-05	0.00106708	0.0516398	0.289166	0.0063456	8.94427e-06	0.00823958	0.00020324	0	0.000649231	0.000300342	0.010315	0.000593143	0.0160776	0.000364206	0.00331895	0.00160528	0.000874797	0.137496	0.0018619	0.0112427	0.0191903
Average	0.097	0.0466667	0.76	0.011	0.17	0.196667	0.003	0.59	0.00466667	0.00833333	0.0833333	1.65333	0.0943333	0.343333	0.724	0.0033	0.116667	0.0446667	0.0116667	0.00533333	0.0814	0.0049	0.00286667	0.328667	0.00898333	0.0021	0.00161333	0.000366667	0.0351333	2.33333	0.426667	1.09033	0.00048	0.147367	0.0104167	0.004	0.0215958	0.0014166	0.053	0.000641041	0.0181189	0.00120215	0.0113882	0.00320278	0.0104168	0.96985	0.00533333	0.052351	0.0983333
NB+PE1	0.09	0.04	0.69	0.007	0.21	0.22	0.082	0.61	0.005	0.007	0.1	1.02	0.078	0.27	0.94	0.0029	0.12	0.076	0.012	0.006	0.1389	0.0068	0.0014	0.258	0.01175	0.0029	0.00154	8.33333e-05	0.0314	2.1	0.502	0.849	0.00028	0.178	0.01034	0.007	0.157275	0.0029687	0.069	0.00123244	0.0450049	0.000977681	0.00925895	0.00346667	0.0106713	1.01381	0.001	0.0422394	0.135
NB+PE2	0.09	0.03	0.68	0.011	0.27	0.26	0.087	0.49	0.006	0.006	0.12	1.05	0.099	0.21	1.073	0.0041	0.12	0.059	0.01	0.006	0.0484	0.0058	0.0045	0.301	0.00944	0.0026	0.00114	6.66667e-05	0.03	2.2	0.553	0.917	0.00033	0.1851	0.0106	0.007	0.146958	0.003063	0.078	0.000597332	0.00995921	0.00135699	0.00848109	0.00216667	0.012515	0.844915	0.001	0.0393283	0.163
NB+PE3	0.09	0.04	0.7	0.007	0.23	0.22	0.063	0.6	0.004	0.007	0.11	1.03	0.082	0.25	0.963	0.0029	0.12	0.067	0.012	0.006	0.1345	0.006	0.0012	0.247	0.01057	0.0031	0.00154	9.16667e-05	0.031	2.1	0.53	0.865	0.00028	0.1808	0.01009	0.007	0.166642	0.0035236	0.07	0.000298659	0.0306574	0.00165431	0.0105619	0.0037	0.0114825	1.07007	0.001	0.0427838	0.149
SD	1.52024e-17	0.00516398	0.00894427	0.00206559	0.0273252	0.0206559	0.0113255	0.0595539	0.000894427	0.000516398	0.00894427	0.0136626	0.0099733	0.0273252	0.0635799	0.000619677	0	0.00760701	0.0010328	9.50147e-19	0.0456404	0.000473286	0.00165489	0.0255238	0.00103314	0.000225093	0.000206559	1.13855e-05	0.000644981	0.0516398	0.0228444	0.0317994	2.58199e-05	0.00319875	0.000228094	0	0.00880607	0.000265571	0.0044121	0.000426538	0.0157585	0.000303339	0.000940401	0.000738968	0.000826473	0.104808	0	0.00166178	0.012522
Average	0.09	0.0366667	0.69	0.00833333	0.236667	0.233333	0.0773333	0.566667	0.005	0.00666667	0.11	1.03333	0.0863333	0.243333	0.992	0.0033	0.12	0.0673333	0.0113333	0.006	0.107267	0.0062	0.00236667	0.268667	0.0105867	0.00286667	0.00140667	8.05556e-05	0.0308	2.13333	0.528333	0.877	0.000296667	0.1813	0.0103433	0.007	0.156958	0.0031851	0.0723333	0.000709476	0.0285405	0.00132966	0.00943399	0.00311111	0.0115563	0.976266	0.001	0.0414505	0.149
[truncated: 18 more columns]
